# Supplementary material for: Trans-ancestry meta-analysis of genome wide association studies of inhibitory control
Source: bioRxiv or medRxiv preprint supplement (doi:10.1101/2022.10.13.22281074), 2022-10-17
Supplement: Supplementary file [file media-2.pdf]

| Trait     | Study | P-value threshold  |              |          |                          |               |                |                          |               |                |                          |               |                 |                          |               |                 |                          |               |                 |                          |               |                 |
|-----------|-------|--------------------|--------------|----------|--------------------------|---------------|----------------|--------------------------|---------------|----------------|--------------------------|---------------|-----------------|--------------------------|---------------|-----------------|--------------------------|---------------|-----------------|--------------------------|---------------|-----------------|
|           |       | 0.001              |              |          | 0.05                     |               |                | 0.1                      |               |                | 0.2                      |               |                 | 0.3                      |               |                 | 0.4                      |               |                 | 0.5                      |               |                 |
|           |       | beta (se)          | R2           | p        | beta (se)                | R2            | p              | beta (se)                | R2            | p              | beta (se)                | R2            | p               | beta (se)                | R2            | p               | beta (se)                | R2            | p               | beta (se)                | R2            | p               |
| GoRT SD   | ABCD  | 0.0018 (0.0027)    | <0.001       | 0.5      | <b>0.0081 (0.0027)</b>   | <b>0.0027</b> | <b>0.00217</b> | <b>0.0087 (0.0027)</b>   | <b>0.0031</b> | <b>0.00102</b> | <b>0.0096 (0.0027)</b>   | <b>0.0038</b> | <b>0.000299</b> | <b>0.0096 (0.0027)</b>   | <b>0.0038</b> | <b>0.000276</b> | <b>0.0099 (0.0027)</b>   | <b>0.004</b>  | <b>0.0002</b>   | <b>0.0102 (0.0026)</b>   | <b>0.0042</b> | <b>0.000126</b> |
|           | SPIT1 | 0.0028 (0.0042)    | <0.001       | 0.511    | -0.0001 (0.0042)         | <0.001        | 0.973          | 0.0024 (0.0042)          | <0.001        | 0.572          | 0.0023 (0.0042)          | <0.001        | 0.591           | 0.0039 (0.0042)          | <0.001        | 0.363           | 0.0033 (0.0042)          | <0.001        | 0.439           | 0.0033 (0.0042)          | <0.001        | 0.433           |
|           | SPIT2 | 0.0098 (0.0108)    | <0.001       | 0.368    | -0.0118 (0.0108)         | <0.001        | 0.276          | -0.0064 (0.0108)         | <0.001        | 0.556          | -0.0019 (0.0108)         | <0.001        | 0.859           | -0.0008 (0.0108)         | <0.001        | 0.943           | 0.0009 (0.0108)          | <0.001        | 0.937           | 0.0014 (0.0108)          | <0.001        | 0.894           |
|           | MEL   | 0.0100 (0.0109)    | <0.001       | 0.36     | -0.0123 (0.0110)         | 0.0012        | 0.265          | -0.0124 (0.0110)         | 0.0013        | 0.259          | -0.0129 (0.0110)         | 0.0014        | 0.243           | -0.0115 (0.0110)         | 0.0011        | 0.296           | -0.0098 (0.0110)         | <0.001        | 0.374           | -0.0075 (0.0110)         | <0.001        | 0.498           |
|           | IMA   | 0.0222 (0.00948)   | 0.00485      | 0.0195   | 0.0292 (0.00947)         | 0.0084        | 0.0021         | 0.0273 (0.00946)         | 0.00738       | 0.00394        | 0.0257 (0.00948)         | 0.00654       | 0.00668         | 0.0248 (0.00948)         | 0.00606       | 0.00904         | 0.0268 (0.00948)         | 0.0071        | 0.00471         | 0.0268 (0.00948)         | 0.00707       | 0.0048          |
|           | OHSU  | -0.0095 (0.0228)   | <0.001       | 0.676    | -0.0304 (0.0229)         | 0.008         | 0.186          | -0.0319 (0.0229)         | 0.0088        | 0.166          | -0.0407 (0.0232)         | 0.014         | 0.081           | -0.0378 (0.0232)         | 0.012         | 0.104           | -0.0382 (0.0231)         | 0.012         | 0.1             | -0.0375 (0.0231)         | 0.012         | 0.107           |
|           | MSU   | 0.0001 (0.0345)    | <0.001       | 0.997    | 0.0076 (0.0340)          | <0.001        | 0.823          | -0.0032 (0.0351)         | <0.001        | 0.926          | 0.0005 (0.0353)          | <0.001        | 0.989           | -0.0004 (0.0351)         | <0.001        | 0.991           | -0.0063 (0.0348)         | <0.001        | 0.857           | -0.0138 (0.0348)         | 0.0012        | 0.692           |
|           |       | <b>beta (se)</b>   | <b>p_het</b> | <b>p</b> | <b>beta (se)</b>         | <b>p_het</b>  | <b>p</b>       | <b>beta (se)</b>         | <b>p_het</b>  | <b>p</b>       | <b>beta (se)</b>         | <b>p_het</b>  | <b>p</b>        | <b>beta (se)</b>         | <b>p_het</b>  | <b>p</b>        | <b>beta (se)</b>         | <b>p_het</b>  | <b>p</b>        | <b>beta (se)</b>         | <b>p_het</b>  | <b>p</b>        |
|           | META  | 0.00357 (0.00211)  | 0.5          | 0.0904   | <b>0.00524 (0.00211)</b> | <b>0.0109</b> | <b>0.013</b>   | <b>0.00629 (0.00211)</b> | <b>0.0331</b> | <b>0.00285</b> | <b>0.00684 (0.00211)</b> | <b>0.0267</b> | <b>0.0012</b>   | <b>0.00731 (0.00211)</b> | <b>0.0598</b> | <b>0.000531</b> | <b>0.00754 (0.00211)</b> | <b>0.0454</b> | <b>0.000352</b> | <b>0.00792 (0.00206)</b> | <b>0.0511</b> | <b>0.000123</b> |
| GoRT Mean | ABCD  | -0.0035 (0.0025)   | <0.001       | 0.166    | -0.0020 (0.0025)         | <0.001        | 0.416          | -0.0021 (0.0025)         | <0.001        | 0.408          | -0.0025 (0.0025)         | <0.001        | 0.308           | -0.0020 (0.0025)         | <0.001        | 0.414           | -0.0020 (0.0025)         | <0.001        | 0.426           | -0.0022 (0.0025)         | <0.001        | 0.373           |
|           | SPIT1 | 0.0002 (0.0024)    | <0.001       | 0.935    | 0.0012 (0.0024)          | <0.001        | 0.61           | 0.0033 (0.0024)          | <0.001        | 0.171          | 0.0040 (0.0024)          | <0.001        | 0.104           | 0.0046 (0.0024)          | <0.001        | 0.058           | 0.0048 (0.0024)          | <0.001        | 0.051           | 0.0047 (0.0024)          | <0.001        | 0.056           |
|           | SPIT2 | -0.0049 (0.0061)   | <0.001       | 0.425    | -0.0011 (0.0061)         | <0.001        | 0.862          | 0.0013 (0.0061)          | <0.001        | 0.828          | 0.0040 (0.0061)          | <0.001        | 0.51            | 0.0052 (0.0061)          | <0.001        | 0.397           | 0.0051 (0.0061)          | <0.001        | 0.398           | 0.0049 (0.0061)          | <0.001        | 0.417           |
|           | MEL   | 0.0023 (0.0069)    | <0.001       | 0.742    | -0.0114 (0.0070)         | 0.0027        | 0.101          | -0.0101 (0.0070)         | 0.0021        | 0.146          | -0.0076 (0.0070)         | 0.0012        | 0.274           | -0.0068 (0.0070)         | <0.001        | 0.331           | -0.0060 (0.0070)         | <0.001        | 0.388           | -0.0052 (0.0070)         | <0.001        | 0.457           |
|           | IMA   | 0.00920 (0.00468)  | 0.00338      | 0.0494   | 0.01175 (0.00468)        | 0.0055        | 0.0121         | 0.00954 (0.00467)        | 0.00364       | 0.0414         | 0.00792 (0.00468)        | 0.0025        | 0.091           | 0.00760 (0.00468)        | 0.0023        | 0.1051          | 0.00841 (0.00468)        | 0.00282       | 0.0728          | 0.00825 (0.00468)        | 0.00271       | 0.0784          |
|           | OHSU  | -0.0118 (0.0170)   | 0.0029       | 0.49     | -0.0186 (0.0171)         | 0.0072        | 0.279          | -0.0152 (0.0172)         | 0.0048        | 0.378          | -0.0267 (0.0174)         | 0.014         | 0.127           | -0.0281 (0.0173)         | 0.016         | 0.106           | -0.0256 (0.0173)         | 0.013         | 0.14            | -0.0285 (0.0172)         | 0.017         | 0.1             |
|           | MSU   | 0.0032 (0.0167)    | <0.001       | 0.849    | 0.0108 (0.0168)          | 0.0028        | 0.521          | 0.0110 (0.0172)          | 0.0027        | 0.522          | 0.0188 (0.0172)          | 0.008         | 0.275           | 0.0146 (0.0170)          | 0.0049        | 0.39            | 0.0197 (0.0169)          | 0.009         | 0.246           | 0.0186 (0.0169)          | 0.008         | 0.273           |
|           |       | <b>beta (se)</b>   | <b>p_het</b> | <b>p</b> | <b>beta (se)</b>         | <b>p_het</b>  | <b>p</b>       | <b>beta (se)</b>         | <b>p_het</b>  | <b>p</b>       | <b>beta (se)</b>         | <b>p_het</b>  | <b>p</b>        | <b>beta (se)</b>         | <b>p_het</b>  | <b>p</b>        | <b>beta (se)</b>         | <b>p_het</b>  | <b>p</b>        | <b>beta (se)</b>         | <b>p_het</b>  | <b>p</b>        |
|           | META  | 0.000502 (0.00152) | 0.321        | 0.741    | 0.000317 (0.00152)       | 0.759         | 0.835          | 0.00113 (0.00152)        | 0.146         | 0.458          | 0.00135 (0.00152)        | 0.088         | 0.375           | 0.00181 (0.00152)        | 0.102         | 0.234           | 0.00207 (0.00152)        | 0.0883        | 0.174           | 0.00193 (0.00152)        | 0.0806        | 0.205           |
| SSRT      | ABCD  | 0.00735 (0.00430)  | <0.001       | 0.0872   | 0.00222 (0.00423)        | <0.001        | 0.5998         | 0.00376 (0.00424)        | <0.001        | 0.3744         | 0.00507 (0.00424)        | <0.001        | 0.232           | 0.00394 (0.00424)        | <0.001        | 0.353           | 0.00239 (0.00425)        | <0.001        | 0.5732          | 0.00295 (0.00425)        | <0.001        | 0.4878          |
|           | SPIT1 | 0.0016 (0.0062)    | <0.001       | 0.79     | -0.0000 (0.0062)         | <0.001        | 0.999          | -0.0018 (0.0062)         | <0.001        | 0.765          | -0.0030 (0.0062)         | <0.001        | 0.623           | -0.0028 (0.0062)         | <0.001        | 0.648           | -0.0030 (0.0062)         | <0.001        | 0.627           | -0.0029 (0.0062)         | <0.001        | 0.642           |
|           | SPIT2 | 0.0085 (0.0150)    | <0.001       | 0.573    | -0.0035 (0.0150)         | <0.001        | 0.814          | 0.0014 (0.0150)          | <0.001        | 0.927          | 0.0082 (0.0150)          | <0.001        | 0.585           | 0.0073 (0.0150)          | <0.001        | 0.629           | 0.0089 (0.0150)          | <0.001        | 0.554           | 0.0123 (0.0150)          | <0.001        | 0.412           |
|           | MEL   | 0.0049 (0.0039)    | 0.0023       | 0.215    | 0.0024 (0.0039)          | <0.001        | 0.536          | 0.0034 (0.0039)          | 0.0011        | 0.386          | 0.0035 (0.0040)          | 0.0011        | 0.38            | 0.0031 (0.0040)          | <0.001        | 0.437           | 0.0034 (0.0040)          | 0.0011        | 0.396           | 0.0044 (0.0040)          | 0.0018        | 0.265           |
|           | IMA   | -0.00875 (0.00539) | 0.002448     | 0.105    | -0.00493 (0.00540)       | <0.001        | 0.361          | -0.00465 (0.00539)       | <0.001        | 0.388          | -0.00523 (0.00540)       | <0.001        | 0.333           | -0.00505 (0.00540)       | <0.001        | 0.35            | -0.00508 (0.00540)       | <0.001        | 0.347           | -0.00552 (0.00540)       | <0.001        | 0.307           |
|           | OHSU  | -0.0087 (0.0245)   | <0.001       | 0.722    | 0.0126 (0.0249)          | 0.0017        | 0.612          | 0.0097 (0.0249)          | 0.001         | 0.696          | 0.0022 (0.0253)          | <0.001        | 0.932           | 0.0035 (0.0252)          | <0.001        | 0.89            | 0.0042 (0.0251)          | <0.001        | 0.868           | 0.0015 (0.0251)          | <0.001        | 0.954           |
|           | MSU   | -0.0535 (0.0586)   | 0.018        | 0.367    | -0.0261 (0.0555)         | 0.0049        | 0.641          | 0.0056 (0.0563)          | <0.001        | 0.921          | 0.0063 (0.0568)          | <0.001        | 0.913           | -0.0004 (0.0580)         | <0.001        | 0.995           | 0.0180 (0.0572)          | 0.0022        | 0.755           | 0.0302 (0.0573)          | 0.0062        | 0.601           |
|           |       | <b>beta (se)</b>   | <b>p_het</b> | <b>p</b> | <b>beta (se)</b>         | <b>p_het</b>  | <b>p</b>       | <b>beta (se)</b>         | <b>p_het</b>  | <b>p</b>       | <b>beta (se)</b>         | <b>p_het</b>  | <b>p</b>        | <b>beta (se)</b>         | <b>p_het</b>  | <b>p</b>        | <b>beta (se)</b>         | <b>p_het</b>  | <b>p</b>        | <b>beta (se)</b>         | <b>p_het</b>  | <b>p</b>        |
|           | META  | 0.00251 (0.00231)  | 0.293        | 0.279    | 0.000579 (0.00230)       | 0.924         | 0.802          | 0.00133 (0.00231)        | 0.899         | 0.565          | 0.00154 (0.00233)        | 0.777         | 0.507           | 0.00111 (0.00233)        | 0.86          | 0.634           | 0.000782 (0.00233)       | 0.866         | 0.737           | 0.00130 (0.00233)        | 0.731         | 0.577           |

**Polygenic score analysis.** Polygenic scores (PGS) constructed from a GWAS for ADHD in EUR samples from sets of (clumped) SNPs reaching varying P-value thresholds in the GWAS. Effect sizes (beta), standard errors (se) and significance (p) are indicated, along with the proportion of the trait variance explained by the PGS (R2); for the meta-analysis of the study centers, significance of tests of heterogeneity (p\_het) are given in lieu of R2.
